# Supplementary material for: Clinical Phenotypes of CDHR1-Associated Retinal Dystrophies
Source: MDPI journal article supplement (doi:10.3390/genes13050925), 2022-05-22
Supplement: s1 [file s1]

**Supplementary Table S1.** The functional effect of genetic missense mutations in this study.

| <i>CDHR1</i> Variant | Mutation | Motif Location | Effect of Mutation      |
|----------------------|----------|----------------|-------------------------|
| c.115A>G             | M39V     | N-terminal     | N/A                     |
| c.143C>A             | T48N     | N-terminal     | N/A                     |
| c.296A>G             | E99G     | CA1            | Ca <sup>+</sup> binding |
| c.601G>A             | E201K    | CA2            | Ca <sup>+</sup> binding |
| c.700G>A             | V234I    | CA2            | N/A                     |
| c.1373T>A            | V458D    | CA4            | N/A                     |
| c.1448A>G            | E483G    | CA4-CA5        | Ca <sup>+</sup> binding |
| c.1700T>C            | L567P    | CA5            | Domain-folding          |
| c.1720C>G            | P574A    | CA5            | Domain-folding          |
| c.2027T>A            | L676N    | CA6            | N/A                     |
| c.2108G>A            | G703D    | TM             | N/A                     |
| c.2203C>A            | P735T    | TM             | N/A                     |
